# Supplementary material
Source: HighWire-hosted journal article supplement (https://erj.ersjournals.com/content/55/4/2000749)
Supplement: inline-supplementary-material-1 [file inline-supplementary-material-1.pdf]

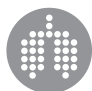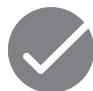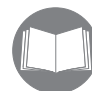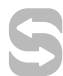

SHAREABLE PDF

# Will children reveal their secret? The coronavirus dilemma

Luca Cristiani<sup>1</sup>, Enrica Mancino<sup>1</sup>, Luigi Matera<sup>1</sup>, Raffaella Nenna <sup>1</sup>,  
Alessandra Pierangeli<sup>2</sup>, Carolina Scagnolari <sup>2</sup> and Fabio Midulla<sup>1</sup>

**Affiliations:** <sup>1</sup>Dept of Maternal Science, Sapienza University of Rome, Rome, Italy. <sup>2</sup>Laboratory of Virology, Dept of Molecular Medicine, affiliated to Istituto Pasteur Italia – Cenci Bolognetti Foundation, Sapienza University, Rome, Italy.

**Correspondence:** Fabio Midulla, University of Rome – Cystic fibrosis, V.le Regina Elena, 324 Rome 00161, Italy. E-mail: lcristiani1989@gmail.com

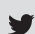

@ERSpublications

**Epidemiological evidence shows that SARS-CoV-2 infection in children is less frequent and severe than adults. Age-related ACE2 receptor expression, lymphocyte count and trained immunity might be the keystone to reveal children's secret.** <https://bit.ly/2QWpWxK>

**Cite this article as:** Cristiani L, Mancino E, Matera L, *et al.* Will children reveal their secret? The coronavirus dilemma. *Eur Respir J* 2020; 55: 2000749 [<https://doi.org/10.1183/13993003.00749-2020>].

This single-page version can be shared freely online.

On 11 March, 2020, a novel human coronavirus, named severe acute respiratory syndrome coronavirus 2 (SARS-CoV-2) became pandemic [1]. By 24 March, 372 757 SARS-CoV-2 confirmed cases and 16 231 related deaths have been reported worldwide [2]. In Italy, 62 844 cases and 5542 deaths have been reported, mostly in northern regions. Detailed data are updated by the Italian National Institute of Health [3].
